# Supplementary material
Source: PubMed Central journal article supplement (PMC8842319)

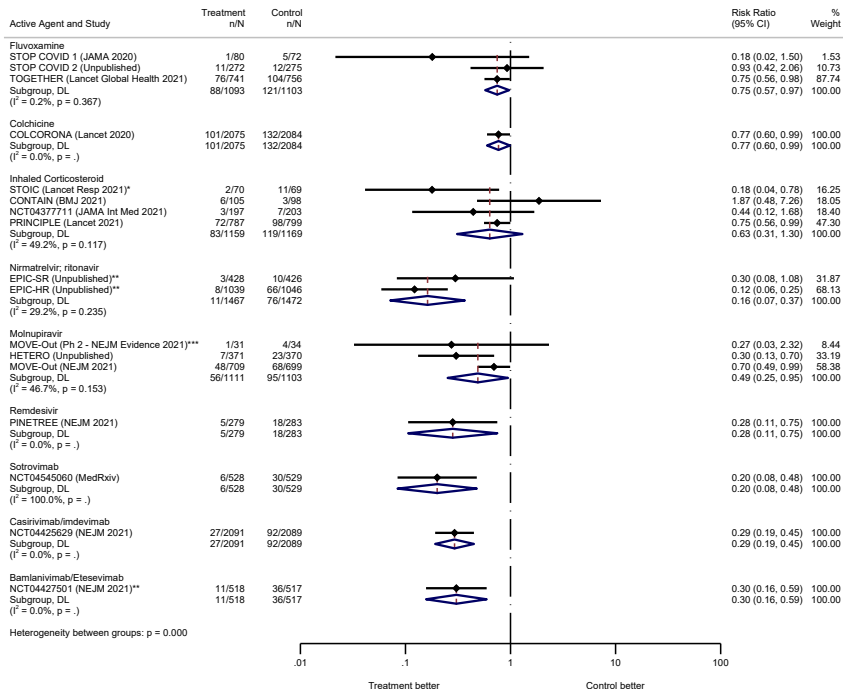

NOTE: Weights and between-subgroup heterogeneity test are from random-effects model

Supplement: ofac008_suppl_supplementary_figure_s1.pdf [file ofac008_suppl_supplementary_figure_s1.pdf]
